# Supplementary material for: Gene expression profiling of homologous recombination repair pathway indicates susceptibility for olaparib treatment in malignant pleural mesothelioma in vitro
Source: PubMed Central journal article supplement (PMC6354412; doi:10.1186/s12885-019-5314-0), 2019-01-30
Supplement: 12885_2019_5314_MOESM3_ESM.pdf [file 12885_2019_5314_MOESM3_ESM.pdf]

**Suppl. Table 2:** AURKA, RAD50, and DDB2 showed statistically significant dependencies on overall and progression-free survival.

| <b>Gene</b>                                            | <b>Likelihood Ratio Test</b> | <b>Score (logrank) Test</b> | <b>Wald Test</b> | <b>Adjusted p-Values for Likelihood Ratio Test</b> | <b>Adjusted p-Values for Score Logrank Test</b> | <b>Adjusted p-Values for Wald Test</b> | <b>Hazard Ratio</b> |
|--------------------------------------------------------|------------------------------|-----------------------------|------------------|----------------------------------------------------|-------------------------------------------------|----------------------------------------|---------------------|
| <b><i>AURKA</i> dependent Overall Survival</b>         | 0.00012                      | 1.2E-05                     | 1.6E-05          | 0.00240                                            | 0.00024                                         | 0.00032                                | 2.397               |
| <b><i>RAD50</i> dependent Overall Survival</b>         | 0.00042                      | 7.5E-05                     | 8.1E-04          | 0.0042                                             | 0.0075                                          | 0.0081                                 | 2.256               |
| <b><i>DDB2</i> dependent Overall Survival</b>          | 0.0019                       | 2.6E-03                     | 2.8E-03          | 0.0216                                             | 0.0135                                          | 0.0135                                 | 4.373               |
| <b><i>AURKA</i> depended Progression-free Survival</b> | 0.00015                      | 6.5E-05                     | 0.00011          | 0.0030                                             | 0.0013                                          | 0.0022                                 | 2.262               |
