# Supplementary material for: Gene expression profiling of homologous recombination repair pathway indicates susceptibility for olaparib treatment in malignant pleural mesothelioma in vitro
Source: Springer Nature journal article supplement (doi:10.1186/s12885-019-5314-0), 2019-01-30
Supplement: MOESM1 [file 16430936]

**Suppl. Table 1:** Normalized counts of genes measured by the Digital Analyzer.

| Sample | <i>ATM</i> | <i>ATR</i> | <i>AURKA</i> | <i>BACH1</i> | <i>BAP1</i> | <i>BARD1</i> | <i>BRCA1</i> | <i>BRCA2</i> | <i>BRIP1</i> | <i>CHEK2</i> | <i>DDB2</i> | <i>EMSY</i> | <i>FANCD2</i> | <i>MRE11</i> | <i>NBN</i> | <i>PALB2</i> | <i>PARP1</i> | <i>RAD50</i> | <i>RAD51</i> | <i>RPA1</i> |
|--------|------------|------------|--------------|--------------|-------------|--------------|--------------|--------------|--------------|--------------|-------------|-------------|---------------|--------------|------------|--------------|--------------|--------------|--------------|-------------|
| 1      | 385        | 289        | 24           | 522          | 536         | 67           | 38           | 2            | 18           | 30           | 305         | 141         | 49            | 96           | 266        | 69           | 549          | 534          | 6            | 448         |
| 2      | 1438       | 631        | 17           | 572          | 428         | 92           | 31           | 19           | 59           | 64           | 230         | 210         | 242           | 166          | 358        | 82           | 1303         | 591          | 6            | 395         |
| 3      | 372        | 337        | 32           | 615          | 523         | 85           | 23           | 5            | 50           | 32           | 346         | 79          | 50            | 70           | 284        | 55           | 834          | 461          | 11           | 257         |
| 4      | 238        | 166        | 29           | 486          | 234         | 43           | 20           | 4            | 34           | 35           | 127         | 93          | 55            | 74           | 271        | 42           | 611          | 393          | 10           | 237         |
| 5      | 196        | 139        | 31           | 327          | 195         | 64           | 14           | 2            | 37           | 5            | 242         | 52          | 47            | 73           | 242        | 44           | 702          | 548          | 16           | 352         |
| 6      | 385        | 325        | 50           | 363          | 227         | 80           | 41           | 15           | 69           | 40           | 221         | 92          | 92            | 117          | 279        | 45           | 700          | 569          | 5            | 203         |
| 7      | 533        | 330        | 73           | 443          | 373         | 56           | 51           | 15           | 111          | 72           | 473         | 137         | 128           | 103          | 268        | 177          | 726          | 496          | 29           | 321         |
| 8      | 379        | 286        | 42           | 431          | 296         | 34           | 28           | 4            | 61           | 64           | 154         | 85          | 84            | 91           | 226        | 33           | 569          | 655          | 13           | 242         |
| 9      | 360        | 187        | 45           | 460          | 383         | 89           | 23           | 14           | 52           | 48           | 364         | 124         | 70            | 94           | 286        | 37           | 510          | 403          | 28           | 386         |
| 10     | 192        | 127        | 60           | 555          | 283         | 57           | 25           | 7            | 86           | 60           | 345         | 99          | 34            | 46           | 288        | 61           | 437          | 378          | 33           | 280         |
| 11     | 135        | 172        | 74           | 335          | 100         | 80           | 38           | 1            | 120          | 59           | 145         | 69          | 84            | 28           | 252        | 55           | 391          | 250          | 38           | 238         |
| 12     | 804        | 299        | 67           | 778          | 331         | 97           | 47           | 29           | 61           | 83           | 160         | 150         | 85            | 123          | 308        | 50           | 1216         | 426          | 23           | 336         |
| 13     | 169        | 202        | 79           | 325          | 148         | 90           | 43           | 7            | 111          | 58           | 173         | 81          | 72            | 65           | 255        | 82           | 315          | 227          | 53           | 316         |
| 14     | 415        | 231        | 73           | 434          | 546         | 72           | 39           | 16           | 59           | 48           | 335         | 131         | 71            | 198          | 305        | 45           | 531          | 371          | 36           | 372         |
| 15     | 365        | 247        | 83           | 594          | 276         | 93           | 59           | 3            | 115          | 62           | 343         | 158         | 148           | 179          | 477        | 76           | 546          | 363          | 45           | 417         |
| 16     | 342        | 237        | 106          | 429          | 312         | 131          | 61           | 8            | 72           | 48           | 393         | 124         | 93            | 181          | 271        | 57           | 549          | 324          | 79           | 472         |
| 17     | 462        | 336        | 130          | 394          | 229         | 133          | 88           | 10           | 164          | 85           | 191         | 86          | 147           | 135          | 305        | 63           | 673          | 555          | 36           | 413         |
| 18     | 416        | 360        | 195          | 568          | 542         | 108          | 50           | 21           | 105          | 43           | 329         | 87          | 79            | 184          | 332        | 56           | 560          | 307          | 53           | 279         |
| 19     | 312        | 341        | 28           | 790          | 366         | 77           | 33           | 3            | 47           | 40           | 286         | 153         | 78            | 173          | 524        | 34           | 766          | 531          | 22           | 311         |
| 20     | 587        | 238        | 28           | 372          | 134         | 72           | 20           | 5            | 46           | 46           | 354         | 131         | 63            | 212          | 206        | 43           | 638          | 663          | 21           | 427         |
| 21     | 389        | 325        | 47           | 581          | 888         | 75           | 31           | 2            | 42           | 52           | 529         | 133         | 53            | 267          | 373        | 70           | 563          | 513          | 23           | 488         |
| 22     | 415        | 255        | 10           | 366          | 70          | 26           | 4            | 7            | 22           | 99           | 562         | 83          | 58            | 302          | 274        | 64           | 398          | 817          | 8            | 346         |
| 23     | 654        | 389        | 22           | 628          | 906         | 79           | 16           | 3            | 13           | 36           | 296         | 183         | 19            | 253          | 394        | 53           | 614          | 487          | 3            | 487         |
| 24     | 418        | 343        | 42           | 543          | 551         | 66           | 26           | 15           | 101          | 67           | 237         | 139         | 69            | 135          | 240        | 40           | 349          | 374          | 32           | 214         |
| 25     | 495        | 345        | 33           | 437          | 400         | 79           | 35           | 14           | 83           | 58           | 259         | 132         | 105           | 171          | 283        | 54           | 459          | 446          | 26           | 335         |
| 26     | 296        | 241        | 28           | 298          | 322         | 51           | 18           | 7            | 46           | 49           | 127         | 76          | 65            | 111          | 191        | 40           | 584          | 855          | 15           | 223         |
| 27     | 144        | 375        | 7            | 228          | 516         | 3            | 2            | 2            | 112          | 18           | 188         | 93          | 130           | 99           | 226        | 35           | 491          | 1060         | 5            | 377         |
| 28     | 338        | 617        | 45           | 264          | 562         | 34           | 22           | 1            | 47           | 79           | 292         | 93          | 69            | 163          | 348        | 72           | 387          | 986          | 4            | 296         |

| Sample | ATM | ATR | AURKA | BACH1 | BAP1 | BARD1 | BRCA1 | BRCA2 | BRIP1 | CHEK2 | DDB2 | EMSY | FANCD2 | MRE11 | NBN | PALB2 | PARP1 | RAD50 | RAD51 | RPA1 |
|--------|-----|-----|-------|-------|------|-------|-------|-------|-------|-------|------|------|--------|-------|-----|-------|-------|-------|-------|------|
| 29     | 402 | 402 | 15    | 654   | 483  | 66    | 11    | 1     | 29    | 85    | 349  | 229  | 74     | 197   | 371 | 30    | 425   | 656   | 1     | 463  |
| 30     | 367 | 290 | 53    | 308   | 287  | 82    | 27    | 1     | 161   | 68    | 234  | 115  | 90     | 149   | 354 | 53    | 355   | 634   | 34    | 410  |
| 31     | 507 | 467 | 56    | 472   | 369  | 91    | 30    | 22    | 119   | 42    | 352  | 162  | 135    | 166   | 359 | 75    | 598   | 550   | 19    | 420  |
| 32     | 362 | 469 | 15    | 403   | 573  | 50    | 3     | 3     | 91    | 15    | 414  | 105  | 39     | 150   | 268 | 64    | 303   | 830   | 3     | 351  |
| 33     | 357 | 711 | 4     | 386   | 1199 | 66    | 4     | 4     | 49    | 49    | 199  | 153  | 49     | 132   | 411 | 36    | 520   | 891   | 4     | 378  |
| 34     | 328 | 279 | 57    | 271   | 70   | 87    | 30    | 9     | 259   | 39    | 218  | 81   | 141    | 125   | 200 | 56    | 353   | 766   | 26    | 154  |
| 35     | 296 | 173 | 98    | 438   | 280  | 95    | 41    | 9     | 139   | 67    | 151  | 96   | 88     | 88    | 327 | 51    | 444   | 485   | 50    | 283  |
| 36     | 718 | 428 | 37    | 333   | 231  | 72    | 36    | 3     | 210   | 87    | 406  | 116  | 120    | 152   | 306 | 47    | 604   | 683   | 22    | 342  |
| 37     | 134 | 391 | 109   | 335   | 421  | 59    | 42    | 9     | 45    | 48    | 254  | 56   | 93     | 81    | 304 | 31    | 382   | 243   | 3     | 193  |
| 38     | 278 | 310 | 66    | 439   | 358  | 50    | 49    | 18    | 91    | 50    | 213  | 52   | 151    | 147   | 272 | 45    | 547   | 693   | 22    | 392  |
| 39     | 287 | 350 | 43    | 367   | 503  | 75    | 38    | 2     | 75    | 88    | 121  | 71   | 90     | 138   | 374 | 32    | 581   | 475   | 17    | 434  |
| 40     | 208 | 234 | 122   | 369   | 435  | 64    | 31    | 12    | 125   | 42    | 290  | 123  | 54     | 112   | 225 | 50    | 484   | 441   | 16    | 248  |
| 41     | 216 | 360 | 75    | 488   | 123  | 139   | 73    | 2     | 225   | 28    | 320  | 91   | 164    | 136   | 388 | 46    | 827   | 447   | 30    | 462  |
| 43     | 238 | 268 | 49    | 363   | 275  | 81    | 34    | 12    | 95    | 45    | 210  | 101  | 121    | 140   | 324 | 42    | 628   | 568   | 7     | 232  |
| 44     | 178 | 272 | 59    | 419   | 131  | 47    | 25    | 7     | 93    | 74    | 433  | 66   | 163    | 91    | 288 | 42    | 317   | 491   | 3     | 231  |
| 45     | 960 | 953 | 56    | 461   | 716  | 110   | 37    | 14    | 121   | 163   | 361  | 236  | 266    | 258   | 419 | 68    | 964   | 636   | 10    | 297  |
| 46     | 265 | 309 | 41    | 295   | 357  | 40    | 33    | 5     | 56    | 37    | 169  | 80   | 90     | 144   | 296 | 48    | 472   | 603   | 11    | 419  |
| 47     | 123 | 258 | 38    | 368   | 217  | 47    | 14    | 1     | 48    | 36    | 303  | 32   | 66     | 62    | 193 | 23    | 371   | 371   | 10    | 178  |
| 48     | 122 | 247 | 41    | 412   | 346  | 47    | 21    | 12    | 66    | 36    | 125  | 97   | 43     | 147   | 211 | 73    | 528   | 553   | 14    | 293  |
| 49     | 266 | 583 | 18    | 471   | 156  | 54    | 4     | 6     | 61    | 56    | 418  | 104  | 73     | 216   | 311 | 51    | 290   | 964   | 2     | 175  |
| 50     | 519 | 491 | 16    | 429   | 126  | 46    | 18    | 7     | 33    | 73    | 312  | 89   | 111    | 280   | 360 | 71    | 312   | 888   | 1     | 341  |
| 51     | 266 | 235 | 122   | 484   | 415  | 93    | 70    | 34    | 62    | 67    | 92   | 80   | 114    | 155   | 222 | 38    | 384   | 238   | 64    | 285  |
| 52     | 555 | 384 | 49    | 521   | 293  | 78    | 27    | 1     | 61    | 78    | 336  | 102  | 119    | 277   | 250 | 55    | 432   | 768   | 9     | 265  |
| 53     | 405 | 287 | 60    | 225   | 203  | 83    | 48    | 8     | 36    | 42    | 206  | 92   | 79     | 154   | 218 | 47    | 523   | 372   | 19    | 276  |
| 54     | 386 | 395 | 51    | 475   | 408  | 121   | 34    | 5     | 51    | 33    | 194  | 110  | 122    | 161   | 198 | 54    | 496   | 398   | 15    | 312  |
| 55     | 252 | 330 | 24    | 574   | 644  | 53    | 14    | 3     | 42    | 35    | 210  | 56   | 118    | 121   | 233 | 6     | 448   | 301   | 3     | 296  |
| 56     | 183 | 185 | 51    | 369   | 343  | 45    | 11    | 2     | 20    | 30    | 149  | 53   | 41     | 85    | 111 | 22    | 173   | 248   | 11    | 102  |
| 57     | 224 | 187 | 116   | 472   | 186  | 71    | 25    | 2     | 53    | 45    | 117  | 71   | 123    | 74    | 323 | 25    | 495   | 230   | 30    | 227  |
| 59     | 243 | 235 | 76    | 339   | 200  | 90    | 28    | 10    | 121   | 38    | 153  | 82   | 120    | 145   | 285 | 39    | 507   | 279   | 32    | 204  |

| Sample | ATM | ATR | AURKA | BACH1 | BAP1 | BARD1 | BRCA1 | BRCA2 | BRIP1 | CHEK2 | DDB2 | EMSY | FANCD2 | MRE11 | NBN | PALB2 | PARP1 | RAD50 | RAD51 | RPA1 |
|--------|-----|-----|-------|-------|------|-------|-------|-------|-------|-------|------|------|--------|-------|-----|-------|-------|-------|-------|------|
| 60     | 296 | 225 | 134   | 313   | 278  | 134   | 48    | 16    | 96    | 52    | 129  | 91   | 176    | 141   | 278 | 54    | 555   | 278   | 52    | 272  |
| 61     | 353 | 275 | 46    | 391   | 288  | 84    | 26    | 12    | 32    | 64    | 133  | 85   | 90     | 168   | 234 | 42    | 516   | 526   | 29    | 308  |
| 62     | 269 | 201 | 94    | 332   | 234  | 93    | 36    | 12    | 58    | 44    | 113  | 84   | 153    | 125   | 315 | 46    | 421   | 251   | 42    | 182  |
| 63     | 269 | 200 | 207   | 785   | 172  | 152   | 46    | 12    | 90    | 73    | 99   | 95   | 65     | 123   | 220 | 42    | 468   | 393   | 74    | 396  |
| 64     | 324 | 273 | 52    | 394   | 365  | 76    | 60    | 11    | 292   | 74    | 391  | 92   | 136    | 179   | 483 | 67    | 354   | 553   | 33    | 261  |
| 65     | 325 | 228 | 59    | 592   | 407  | 96    | 46    | 27    | 113   | 46    | 468  | 74   | 258    | 133   | 161 | 58    | 501   | 459   | 44    | 459  |
| 66     | 328 | 348 | 90    | 695   | 284  | 54    | 40    | 9     | 49    | 63    | 187  | 65   | 97     | 129   | 311 | 52    | 569   | 553   | 22    | 326  |
| 69     | 471 | 340 | 14    | 829   | 537  | 78    | 29    | 2     | 38    | 65    | 401  | 135  | 63     | 235   | 450 | 65    | 486   | 592   | 6     | 368  |
| 70     | 265 | 241 | 84    | 312   | 380  | 76    | 54    | 27    | 60    | 61    | 92   | 64   | 132    | 132   | 213 | 46    | 528   | 303   | 38    | 402  |
| 71     | 142 | 169 | 49    | 340   | 307  | 58    | 19    | 1     | 50    | 34    | 174  | 39   | 51     | 95    | 141 | 23    | 406   | 211   | 19    | 196  |
| 72     | 239 | 245 | 62    | 330   | 319  | 55    | 39    | 11    | 60    | 44    | 201  | 80   | 65     | 124   | 212 | 32    | 422   | 393   | 30    | 182  |
| 73     | 297 | 288 | 150   | 407   | 272  | 57    | 62    | 5     | 166   | 45    | 142  | 63   | 134    | 125   | 308 | 37    | 461   | 206   | 40    | 323  |
| 74     | 655 | 352 | 6     | 295   | 264  | 10    | 4     | 1     | 25    | 104   | 212  | 51   | 155    | 186   | 147 | 52    | 515   | 939   | 1     | 402  |
| 75     | 182 | 206 | 38    | 550   | 213  | 48    | 30    | 7     | 63    | 33    | 160  | 82   | 98     | 67    | 237 | 41    | 541   | 414   | 15    | 268  |
| 77     | 347 | 209 | 32    | 409   | 302  | 48    | 29    | 8     | 28    | 34    | 125  | 55   | 81     | 123   | 207 | 26    | 386   | 383   | 7     | 260  |
| 78     | 373 | 295 | 31    | 486   | 102  | 78    | 21    | 7     | 98    | 46    | 296  | 115  | 118    | 196   | 320 | 51    | 630   | 393   | 28    | 323  |
| 79     | 397 | 220 | 17    | 425   | 131  | 44    | 15    | 9     | 70    | 72    | 268  | 103  | 98     | 189   | 236 | 52    | 262   | 504   | 12    | 228  |
| 80     | 287 | 344 | 54    | 486   | 458  | 61    | 46    | 22    | 86    | 52    | 199  | 99   | 81     | 167   | 230 | 25    | 493   | 475   | 27    | 189  |
| 81     | 239 | 197 | 26    | 330   | 147  | 37    | 17    | 4     | 51    | 41    | 268  | 79   | 43     | 143   | 199 | 54    | 371   | 474   | 14    | 208  |
| 82     | 491 | 255 | 14    | 409   | 322  | 33    | 13    | 12    | 26    | 30    | 279  | 125  | 62     | 247   | 195 | 57    | 364   | 561   | 2     | 191  |
| 83     | 302 | 219 | 56    | 667   | 222  | 79    | 47    | 20    | 137   | 68    | 274  | 149  | 100    | 159   | 337 | 57    | 544   | 344   | 30    | 271  |
| 84     | 326 | 394 | 3     | 496   | 473  | 40    | 9     | 6     | 43    | 48    | 273  | 90   | 126    | 113   | 336 | 22    | 494   | 305   | 3     | 126  |
| 85     | 160 | 184 | 37    | 279   | 366  | 41    | 28    | 6     | 70    | 27    | 87   | 69   | 44     | 74    | 235 | 36    | 514   | 278   | 10    | 119  |
| 86     | 441 | 305 | 9     | 524   | 594  | 37    | 10    | 12    | 20    | 62    | 272  | 124  | 84     | 194   | 363 | 61    | 552   | 635   | 8     | 211  |
| 87     | 754 | 311 | 18    | 541   | 311  | 58    | 18    | 18    | 68    | 98    | 280  | 176  | 71     | 226   | 432 | 68    | 314   | 573   | 10    | 374  |
| 88     | 193 | 279 | 22    | 354   | 505  | 30    | 20    | 2     | 79    | 16    | 257  | 37   | 83     | 157   | 379 | 32    | 416   | 566   | 2     | 183  |
| 89     | 233 | 262 | 66    | 359   | 83   | 86    | 59    | 5     | 113   | 78    | 268  | 84   | 147    | 156   | 306 | 46    | 500   | 264   | 42    | 221  |
| 90     | 780 | 367 | 32    | 500   | 381  | 59    | 22    | 19    | 149   | 79    | 310  | 129  | 107    | 261   | 389 | 59    | 533   | 473   | 18    | 212  |
| 91     | 141 | 413 | 28    | 405   | 167  | 84    | 12    | 5     | 138   | 44    | 464  | 90   | 202    | 154   | 223 | 61    | 312   | 440   | 13    | 280  |

| <b>Sample</b>        | <b>ATM</b> | <b>ATR</b> | <b>AURKA</b> | <b>BACH1</b> | <b>BAP1</b> | <b>BARD1</b> | <b>BRCA1</b> | <b>BRCA2</b> | <b>BRIP1</b> | <b>CHEK2</b> | <b>DDB2</b> | <b>EMSY</b> | <b>FANCD2</b> | <b>MRE11</b> | <b>NBN</b> | <b>PALB2</b> | <b>PARP1</b> | <b>RAD50</b> | <b>RAD51</b> | <b>RPA1</b> |
|----------------------|------------|------------|--------------|--------------|-------------|--------------|--------------|--------------|--------------|--------------|-------------|-------------|---------------|--------------|------------|--------------|--------------|--------------|--------------|-------------|
| <b>92</b>            | 255        | 324        | 21           | 550          | 437         | 58           | 10           | 13           | 50           | 39           | 184         | 68          | 60            | 71           | 202        | 13           | 226          | 413          | 18           | 231         |
| <b>93</b>            | 289        | 299        | 9            | 715          | 481         | 49           | 3            | 3            | 12           | 12           | 322         | 65          | 49            | 128          | 233        | 19           | 263          | 322          | 3            | 293         |
| <b>94</b>            | 404        | 397        | 25           | 557          | 408         | 38           | 17           | 17           | 19           | 60           | 502         | 111         | 63            | 224          | 249        | 60           | 500          | 701          | 4            | 284         |
| <b>95</b>            | 333        | 292        | 15           | 620          | 404         | 49           | 9            | 5            | 42           | 24           | 190         | 86          | 39            | 140          | 176        | 20           | 381          | 491          | 8            | 273         |
| <b>96</b>            | 350        | 305        | 14           | 276          | 103         | 36           | 8            | 3            | 24           | 48           | 424         | 48          | 55            | 153          | 172        | 49           | 299          | 676          | 6            | 262         |
| <b>MRC-5, P10</b>    | 191        | 155        | 431          | 466          | 233         | 164          | 82           | 36           | 250          | 70           | 125         | 112         | 121           | 153          | 174        | 48           | 639          | 191          | 138          | 541         |
| <b>MSTO-211H, P6</b> | 72         | 109        | 453          | 135          | 159         | 37           | 110          | 24           | 120          | 45           | 119         | 67          | 153           | 144          | 147        | 41           | 784          | 144          | 46           | 548         |
| <b>NCI H2052, P5</b> | 193        | 138        | 764          | 337          | 248         | 147          | 107          | 43           | 346          | 42           | 676         | 131         | 176           | 365          | 362        | 55           | 700          | 378          | 110          | 564         |
| <b>NCI H2452, P5</b> | 118        | 158        | 338          | 329          | 117         | 126          | 84           | 161          | 109          | 208          | 71          | 77          | 155           | 156          | 204        | 53           | 349          | 328          | 79           | 536         |
