# Supplementary material for: Gene expression profiling of homologous recombination repair pathway indicates susceptibility for olaparib treatment in malignant pleural mesothelioma in vitro
Source: Springer Nature journal article supplement (doi:10.1186/s12885-019-5314-0), 2019-01-30
Supplement: MOESM2 [file 16430936]

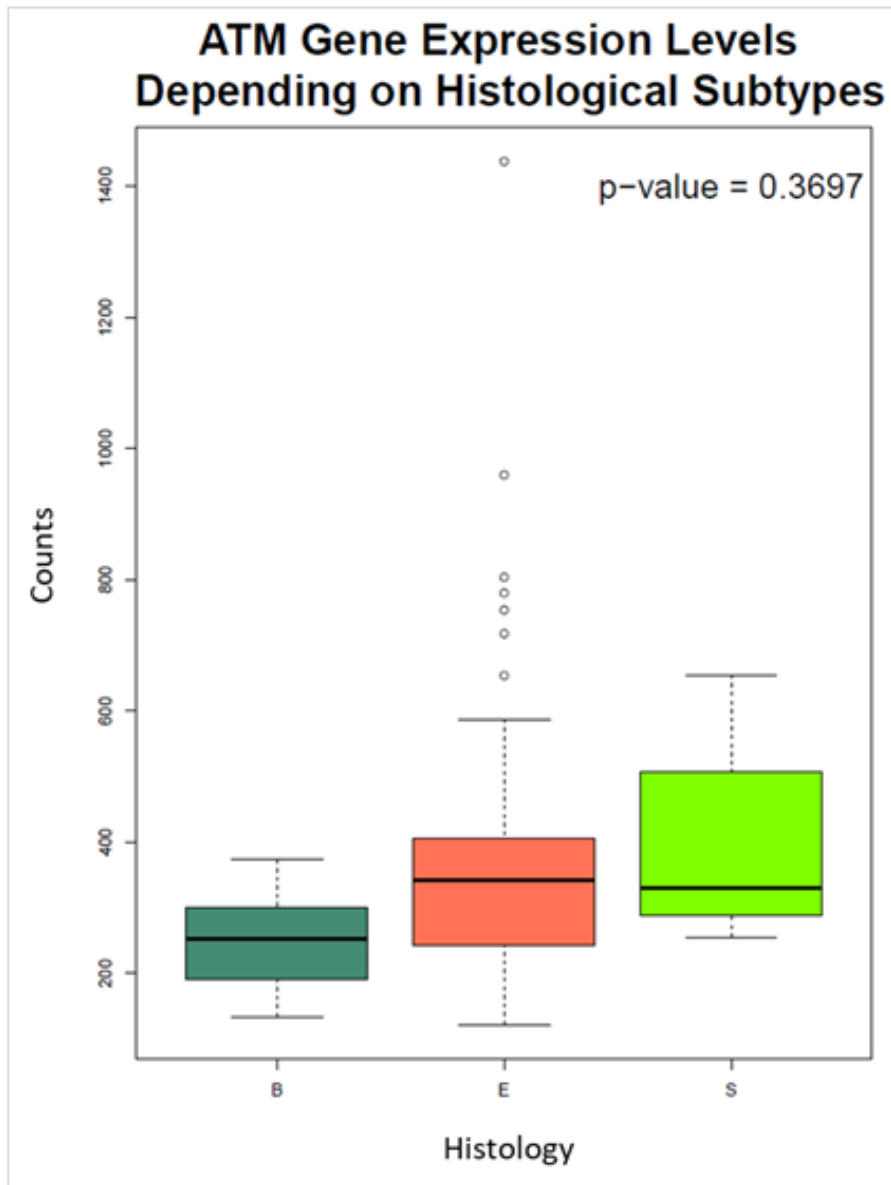

**Suppl. Figure1:** Expression of tested genes is independent of histomorphology of MPM. The boxplot shows no significant differences between gene expression patterns due to biphasic (B), epithelioid (E), or sarcomatoid (S) MPM.
